## Synaptic Mechanisms of Thiopental-induced Alterations in Synchronized Cortical Activity

Heath S. Lukatch, B.A.,\* M. Bruce MacIver, M.Sc., Ph.D.†

**Background:** Anesthetic depth after barbiturate administration has been correlated with distinct electroencephalogram (EEG) patterns. The current study used a rat neocortical brain slice micro-EEG preparation to investigate synaptic mechanisms underlying thiopental-induced transitions in synchronized neuronal activity.

**Methods:** Concentration-dependent cellular actions of thiopental were investigated in brain slices using specific pharmacologic probes, whole cell patch clamps, and extracellular field recordings.  $\theta$ -Like micro-EEG oscillations were elicited in neocortical slices by mimicking subcortical cholinergic and gamma-aminobutyric acid (GABA) afferent input with carbachol (100  $\mu$ M), a cholinergic agonist, and bicuculline (10  $\mu$ M) a GABA<sub>A</sub> antagonist.

**Results:** In the presence of 20  $\mu$ M thiopental, micro-EEG slowing from  $\theta$  ( $7.3 \pm 0.9$  Hz, mean  $\pm$  SD,  $n = 19$ ) to  $\delta$  frequencies ( $2.5 \pm 0.5$  Hz,  $n = 11$ ) was associated with a threefold prolongation of inhibitory currents. Burst suppression activity occurred at 50  $\mu$ M thiopental, and appeared to result from direct activation of GABA<sub>A</sub>-gated chloride currents, observed with voltage clamp recordings, and mimicked with a direct acting GABA<sub>A</sub> agonist, muscimol (1  $\mu$ M). Isoelectric activity occurred at 100  $\mu$ M thiopental, and likely resulted from reduced glutamatergic transmission, evidenced by depressed excitatory postsynaptic potentials. Glutamatergic excitation was required for burst suppression activity, because glutamate receptor antagonists blocked thiopental-induced bursts; forcing a transition to isoelectric activity.

**Conclusions:** Thiopental produced a continuum of EEG-like states in brain slices similar to those observed *in vivo*. The progression of thiopental-induced effects appear to have resulted from specific cellular actions that were recruited in a concentration-dependent manner. Progressive enhancement of synaptic inhibition followed by depression of excitatory transmission led to micro-EEG frequency slowing, burst

suppression, and isoelectric activity. (Key words: Anesthetics, barbiturates: thiopental. Brain:  $\gamma$ -aminobutyric acid; hippocampus; neocortex. Monitoring, electroencephalogram: burst suppression; isoelectric electroencephalogram activity; oscillations. Monitoring, electroencephalographic frequency bands: alpha; delta; theta. Receptors: glutamate; muscarinic.)

ALTHOUGH a variety of cellular actions have been associated with barbiturate anesthesia,<sup>1-6</sup> it remains unclear which actions are most relevant for achieving and maintaining progressively deeper levels of anesthesia. Previous studies have shown that thiopental-induced electroencephalographic (EEG) alterations can be correlated with behavioral measures of anesthetic depth.<sup>7-11</sup> During wakefulness, 3.5–7.5 Hz  $\theta$  rhythm activity dominates rat EEG activity. Loss of tail pinch reflex occurs when EEG activity slows into the  $\delta$  range (0.5–3.5 Hz). Loss of corneal reflex occurs during EEG burst suppression, and isoelectric activity is required for blocking reflex responses to intubation.<sup>11</sup> The ability to generate synchronous EEG-like activity using *in vitro* preparations<sup>12-15</sup> prompted the current study investigating thiopental actions on micro-EEG activity in neocortical rat brain slices in an attempt to link synaptic mechanisms of action with the continuum of EEG effects observed during thiopental anesthesia.

### Materials and Methods

Two separate experimental protocols were used in the current study. EEG-like activity was pharmacologically evoked in neocortical regions, while patch clamp and evoked field excitatory postsynaptic potential (EPSP) recordings were performed in hippocampal cortex. Hippocampal rather than neocortical neurons were patched because of difficulties associated with eliciting synchronous monosynaptic evoked inhibitory postsynaptic currents (IPSCs) in neocortex, and because of difficulties associated with patching onto sparsely distributed neocortical somata. It was shown that thiopental produced similar effects on hippocam-

\* Doctoral Candidate, Stanford Neuroscience Program.

† Assistant Professor of Neurophysiology, Stanford Anesthesia.

Received from the Stanford Neuroscience Program and Neuropharmacology Laboratory, Department of Anesthesia, Stanford University School of Medicine, Stanford, California. Submitted for publication May 22, 1995. Accepted for publication January 23, 1996. Supported in part by National Institutes of Health grant GM49811 and United States Air Force Office of Scientific Research.

Address reprint requests to Dr. MacIver: Department of Anesthesia, Stanford University School of Medicine, Stanford, California 94305-5117. Address electronic mail to: bruce.maciver@forsythe.stanford.edu.



pal and neocortical EEG activity, as shown in the preceding *in vivo* article.<sup>10</sup> Previous studies have shown that  $\theta$  EEG activity in hippocampal slices<sup>12-14,16</sup> shares a similar frequency (3.5–7.5 Hz.), amplitude (50–250  $\mu$ V), and pharmacologic profile with the neocortical  $\xi$ -like oscillations observed in the current study.

### Slice Preparation

Experiments were performed on slices isolated from juvenile male Sprague-Dawley rats (weighing 80–120 g). Experimental protocols were approved by the Institutional Animal Care Committee at Stanford University and adhered to published guidelines of the National Institutes of Health, Society for Neuroscience, and American Physiological Society. Rats were anesthetized with diethyl ether and their hearts were stopped with a blow to the back of the thorax. Brains were removed to cold (1–2°C) oxygenated artificial cerebrospinal fluid (ACSF, see Materials). Brains were sectioned in the coronal plane into 450- $\mu$ m thick slices using a vibratome (Vibraslice, Boston, MA). Slices containing both neocortical and hippocampal areas were then hemisected and placed on filter papers at the interface of a humidified carbogen (95% O<sub>2</sub>/5% CO<sub>2</sub>) gas phase and ACSF liquid phase. Slices were allowed at least 1 h to recover from the slicing procedure before submersion in ACSF in a recording chamber. The ACSF was saturated with carbogen gas and perfused at a rate of 2.5 ml/min, at room temperature (21–24°C). Rapid and accurate solution changes were made using a ValveBank8 computerized perfusion system (AutoMate Scientific, Oakland, CA). Thiopental concentrations were measured using high-performance liquid chromatography.<sup>17</sup>

### Micro-electroencephalogram Generation, Recording, and Analysis

*In vivo*  $\theta$  EEG activity has been shown to be associated with activation of both ascending cholinergic and GABAergic inputs.<sup>18</sup> Cholinergic inputs are thought to depolarize pyramidal neurons, whereas GABAergic inputs have been shown to selectively innervate inhibitory neocortical interneurons,<sup>19,20</sup> suggesting that activation of these GABAergic afferents results in neocortical disinhibition. These endogenous inputs were mimicked in neocortical slice micro-EEG experiments by using ACSF containing the cholinergic agonist carbachol (100  $\mu$ M), and the GABA<sub>A</sub> antagonist bicuculline (10  $\mu$ M).  $\gamma$ -Aminobutyric acid (GABA) was not used because in addition to blocking inhibitory interneuron activity, it

would directly inhibit pyramidal neurons and interfere with cholinergic excitation of these cells.

Pharmacologically evoked EEG-like oscillations were recorded with low resistance (<2 M $\Omega$ ) glass microelectrodes filled with ACSF and placed in layer 2 or 3 of the neocortex for most experiments (fig. 1). These micro-EEG signals were amplified  $\times 10,000$ –50,000 (model 210A; Brown-Lee Precision, San Jose, CA), filtered 1–30 Hz band-pass, 60 Hz notch (Cyber Amp 380, Axon Instrument, Foster City, CA), digitized (256 or 2,048 Hz; DataWave Technologies, Longmont, CO) and stored on computer disk for further analysis. Micro-EEG spectral analysis was accomplished using fast Fourier transforms on 2.5-s long epochs of data using DataWave software.

### Micro-electroencephalogram Pharmacology

Before drug application, each neocortical slice displayed a 20-min baseline consisting of trains of spontaneous  $\theta$ -like micro-EEG activity in ACSF containing carbachol (100  $\mu$ M) and bicuculline (10  $\mu$ M). All pharmacologic agents were applied in ACSF containing carbachol and bicuculline, and drug application was continued until steady-state effects were achieved (*i.e.*, burst suppression or isoelectric activity). Drug washout began within 15 min of achieving a steady-state effect.

### Single Cell Recording

Whole cell recording microelectrodes (4–8 M $\Omega$ ) contained an internal solution comprising (in mM): K-glucuronate 100; ethylene glycol-bis( $\beta$ -amino-ethyl ether) N,N,N',N'-tetra acetic acid 10; MgCl<sub>2</sub> 5; N-[Z-hydroxyethyl]piperazine-N'-[Z-ethane sulfonic acid] (HEPES) 40; adenosine triphosphate 0.3; and guanosine triphosphate 0.3, pH = 7.2 and osmolarity = 280–290 mOsm. Mono-synaptic IPSCs were evoked in stratum radiatum with a bipolar-stimulating electrode (5 V, 250  $\mu$ s, 0.033 Hz), in the presence of 6-cyano-7-nitroquinoxaline-2,3-dione and ( $\pm$ )-2-amino-5-phosphonovaleric acid (see Materials) to block excitatory glutamate-mediated transmission. Stimulating electrodes were placed for optimal GABA<sub>A</sub> slow IPSC activation.<sup>21</sup> Cells were voltage clamped at –60 mV (Axoclamp 2A, Axon Instrument), which is typical for resting membrane potentials in hippocampal pyramidal cells.<sup>22</sup> Signals were amplified ( $\times 500$ ), filtered (DC–10 kHz band-pass; Axon Instrument), digitized (10 kHz; DataWave Technologies) and stored on computer disk for further analysis.

### Hippocampal Field Recordings

Field EPSPs were evoked (3–8 V, 250  $\mu$ s, 0.1 Hz) with a bipolar tungsten stimulating electrode placed in stratum



## SYNAPTIC MECHANISMS OF THIOPENTAL

**Fig. 1.** Characterization of  $\theta$ -like EEG generator in neocortex (area Oc2MM). (A) Micro-EEG recording positions in a hemisected coronal brain slice map the presence (●) or absence (○) of neocortical  $\theta$  frequency oscillations. Larger symbols represent higher amplitude activity.  $\theta$ -like activity was observed primarily in cortical area Oc2MM, and oscillation amplitudes were greatest in superficial cortical layers 1, 2, and 3. (B) Two second voltage traces show the absence of micro-EEG activity under control conditions and in the presence of a cholinergic agonist, carbachol (100  $\mu$ M). Bicuculline (10  $\mu$ M), a GABA<sub>A</sub> antagonist, elicited only large amplitude spike activity. Sinusoidal  $\theta$ -like oscillations were generated by simultaneous application of both carbachol and bicuculline.  $\theta$  activity was abolished by the muscarinic receptor antagonist, atropine (0.5  $\mu$ M), leaving only bicuculline-mediated events. A dissected mini-slice containing only area Oc2MM displayed spontaneous  $\theta$  frequency oscillations, demonstrating the presence of an intrinsic micro-EEG generator in this cortical region. Scale bars equal 50  $\mu$ V and 200 ms, respectively.

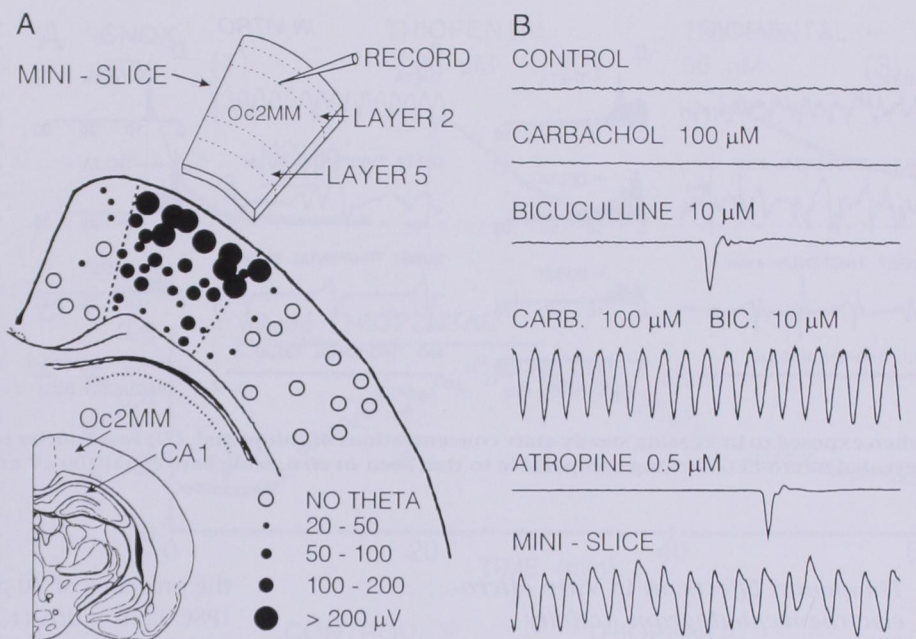

radiatum of area CA1. EPSPs were recorded with low resistance (<2 M $\Omega$ ) glass electrodes filled with ACSF also placed in stratum radiatum.<sup>23</sup> Signals were amplified ( $\times 5,000$ ), filtered (DC to 10 kHz) and digitized.

### Materials

Rats were obtained from Simonsen Laboratories (Gilroy, CA). Thiopental, carbamylcholine chloride (carbachol), and atropine sulfate were obtained from Sigma (St. Louis, MO). (–)-Bicuculline methiodide, muscimol HBr, ( $\pm$ )-2-amino-5-phosphonovaleric acid and 6-cyano-7-nitroquinoxaline-2,3-dione were supplied by Research Biochemicals International (Natick, MA). All solutions were made with spectrophotometric grade water (Omnisolve) supplied by EM Science (Gibbstown, NJ). The ACSF had the following ionic composition (in mM): Na<sup>+</sup> 151.25; K<sup>+</sup> 3.5; Ca<sup>++</sup> 2.0; Mg<sup>++</sup> 2.0; Cl<sup>–</sup> 130.5; HCO<sub>3</sub><sup>–</sup> 26; SO<sub>4</sub><sup>–</sup> 2.0; H<sub>2</sub>PO<sub>4</sub><sup>–</sup> 1.25; and glucose 10. Chemicals for the ACSF were reagent grade or better and obtained from J.T. Baker (Philadelphia, PA).

## Results

### Neocortical $\theta$ Frequency Generator

Spontaneous trains of neocortical  $\theta$ -like micro-EEG activity, lasting up to 9 s and ranging in amplitude

from 20 to 450  $\mu$ V, appeared *in vitro* during bath application of carbachol and bicuculline (fig. 1). These  $\theta$  trains occurred 0.5–2 times per minute and, like cholinergically driven type II  $\theta$  *in vivo*,<sup>18</sup> were blocked by the muscarinic receptor antagonist atropine (0.5  $\mu$ M). This  $\theta$ -like micro-EEG activity was not observed throughout the entire neocortex, rather it was confined to a bilateral strip of medial occipital cortex that runs rostrocaudally and included four anatomically defined areas: 29d, 18b, 17, and 18a,<sup>24</sup> also known as the occipital association areas: Oc2MM, Oc2MM/Oc2ML, Oc1M/Oc1B, and Oc2L, respectively.<sup>25</sup> Previous *in vivo* studies also have demonstrated the occurrence of  $\theta$  EEG activity within these anatomically defined cortical regions.<sup>26,27</sup> The neurons and synchronizing circuits generating these  $\theta$  frequency oscillations must be intrinsic to neocortex because isolated mini-slices of Oc2MM cortex produced  $\theta$ -like activity, and paired electrode differential recordings revealed a phase reversal in this cortical region, indicating the presence of a local neuronal generator. The narrow bandwidth and sinusoidal nature of *in vitro* neocortical micro-EEG activity (fig. 1) may be caused by removal of other ascending modulatory influences such as catecholamine or indolamine afferents.



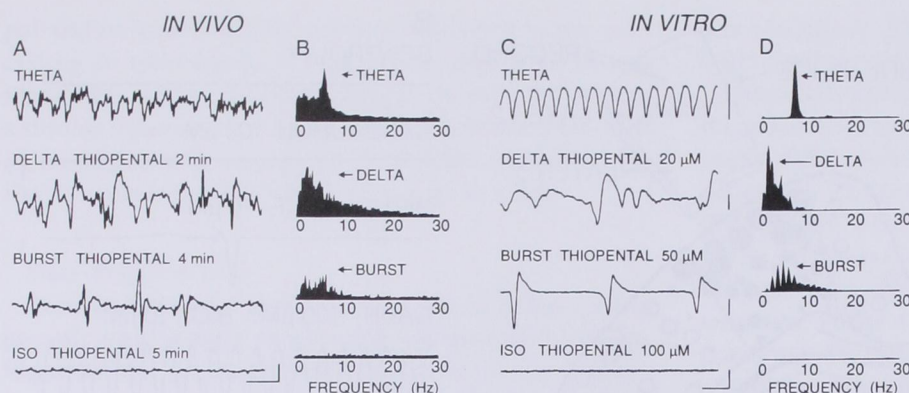

Fig. 2. Thiopental produced three distinct transitions in EEG spectra *in vivo* and *in vitro*. (A) *In vivo* recordings (2 s) from experiments described in MacIver *et al.*<sup>10</sup> show a thiopental-induced progression of EEG effects:  $\theta > \delta > \text{BURST}$  (burst suppression)  $> \text{ISO}$  (isoelectric). These EEG recordings were obtained at various times during a thiopental infusion (10 mg/kg/min, for ~5 min). (B) Fast Fourier transforms of the waveforms displayed in (A) show a progressive slowing of EEG peak frequency with increasing concentrations of thiopental. (C) Recordings in neocortical brain slices displayed a similar progression of micro-EEG patterns

when exposed to increasing steady-state concentrations of thiopental. (D) Fast Fourier transform analysis of *in vitro* recordings revealed micro-EEG slowing comparable to that seen *in vivo*. Scale bars equal 100  $\mu\text{V}$  and 200 ms, respectively.

#### Thiopental Effects on In Vitro Micro-electroencephalogram Activity

Thiopental concentrations in brain slices were matched to calculated *in vivo* thiopental levels that produced progressively deeper stages of anesthesia.<sup>9,10</sup> In brain slices, fast Fourier transform analysis revealed that 20  $\mu\text{M}$  thiopental produced a threefold decrease in micro-EEG frequency, from  $\theta$  ( $7.3 \pm 0.9$  Hz; mean  $\pm$  SD;  $n = 19$ ) to  $\delta$  ( $2.5 \pm 0.5$  Hz,  $n = 11$ ). This decrease was comparable to a threefold slowing of EEG frequencies observed *in vivo* (fig. 2). Slice micro-EEG amplitudes increased ~375% during transitions from  $\theta$  to  $\delta$  frequency oscillations, also similar to results obtained *in vivo*.<sup>10</sup> Higher concentrations of thiopental (50  $\mu\text{M}$ ;  $n = 11$ ) produced burst suppression micro-EEG patterns, characterized by large amplitude (200–500  $\mu\text{V}$ ) burst discharges separated by brief periods of isoelectric activity (figs. 2A and 2C). Burst activity in slices was either monophasic or biphasic with a sharp negativity followed by a low amplitude positive overshoot. *In vitro* bursts were typically separated by 0.5–3 s, whereas *in vivo* bursts were more varied (separated by 0.1–5 s). Increasing thiopental levels to 100  $\mu\text{M}$  produced isoelectric activity, which reversed to  $\theta$ -like activity after barbiturate washout (5 of 5 brain slices). Thus, a similar progression in EEG profiles was observed *in vivo* and *in vitro* over a clinically relevant concentration range.

#### Thiopental Prolongation of Inhibitory Currents Produced Micro-electroencephalogram Slowing

Thiopental effects on inhibitory currents were examined using whole cell patch clamp recordings. In

the presence of 20  $\mu\text{M}$  thiopental, monosynaptic evoked IPSC half width ( $t_{1/2}$ ) increased approximately threefold from  $135 \pm 22$  ms ( $n = 8$ ) to  $400 \pm 40$  ms ( $n = 5$ ), whereas IPSC amplitudes remained relatively unchanged (figs. 3A and 3B). This threefold increase in IPSC  $t_{1/2}$  was associated with the threefold slowing in micro-EEG frequencies observed during  $\theta$  to  $\delta$  transitions also produced by 20  $\mu\text{M}$  thiopental (fig. 2).

To compare thiopental effects on IPSCs with effects on micro-EEG slowing,  $\theta$  and  $\delta$  rhythms were approximated as sine waves (fig. 3C).  $\theta$  and  $\delta$  sine wave periodicities of 137 and 397 ms were calculated from experimental mean  $\theta$  (7.3 Hz) and  $\delta$  (2.5 Hz) oscillation frequencies, respectively. Modeled EEG waves were superimposed on IPSCs recorded in the presence or absence of 20  $\mu\text{M}$  thiopental (fig. 3C). Control and thiopental-prolonged IPSC amplitudes were compared at times corresponding to the periodicity of either  $\theta$  or  $\delta$  frequency oscillations, and revealed that both IPSCs had decayed ~38% from their peak values over these time periods (fig. 3C). The inhibitory current amplitude (~140 pA) associated with these time points may represent a critical degree of inhibition such that EEG generating neurons discharge and then remain inhibited until recurrent IPSCs decay below this critical level (*i.e.*, after 137 ms in control conditions *vs.* 397 ms in the presence of 20  $\mu\text{M}$  thiopental). Thus, micro-EEG oscillation frequency appeared to depend on IPSC decay times. The thiopental-induced increase in variability of IPSC  $t_{1/2}$  (fig. 3B) was also apparent in the increased standard deviation for  $\delta$  micro-EEG activity (fig. 3C), as expected if IPSC prolongation resulted in the observed decrease in micro-EEG frequencies.



## SYNAPTIC MECHANISMS OF THIOPENTAL

Fig. 3. Whole cell recordings demonstrated a thiopental-induced inhibitory postsynaptic current (IPSC) prolongation followed by direct activation of inhibitory currents. (A) Monosynaptic evoked IPSCs (1) were isolated using glutamate receptor blockers 6-cyano-7-nitroquinoxaline-2,3-dione ( $8.6 \mu\text{M}$ ) and ( $\pm$ )-2-amino-5-phosphonovaleric acid ( $125 \mu\text{M}$ ). During application of  $50 \mu\text{M}$  thiopental, IPSC duration increased until a steady state was achieved. The trace displayed in (2) shows a presteady-state effect ( $\sim 20 \mu\text{M}$ ) of  $50 \mu\text{M}$  thiopental on inhibitory postsynaptic current amplitude and duration. This recording was selected based on its similarity to effects observed in the presence of steady-state concentrations of  $20 \mu\text{M}$  thiopental (see text). Under these conditions, IPSC  $t_{1/2}$  increased approximately threefold. This prolongation was also observed at steady-state concentrations of  $50 \mu\text{M}$  thiopental (3). In addition to prolonging IPSC  $t_{1/2}$ ,  $50 \mu\text{M}$  thiopental also produced a  $98 \text{ pA}$  positive shift in holding current necessary to maintain the voltage clamp at  $-60 \text{ mV}$ . (B) Experimental time course of thiopental-induced IPSC  $t_{1/2}$  increase (arrows indicate traces displayed in A), note the increased variability in  $t_{1/2}$  produced by thiopental. (C) Comparison of IPSC time courses and micro-EEG periodicities.  $\xi$  and  $\delta$  waveforms were plotted on control and thiopental prolonged IPSCs. The intercept point for each wave occurred at the same amplitude on the appropriate IPSC. The dashed line tangent to the peaks of both waveforms represents a critical amount of recurrent inhibition, above which EEG generating cells may be unable to discharge. The time bar shows the mean and SD for each micro-EEG waveform, and the increased variability in micro-EEG periodicity produced by thiopental during  $\delta$  activity.

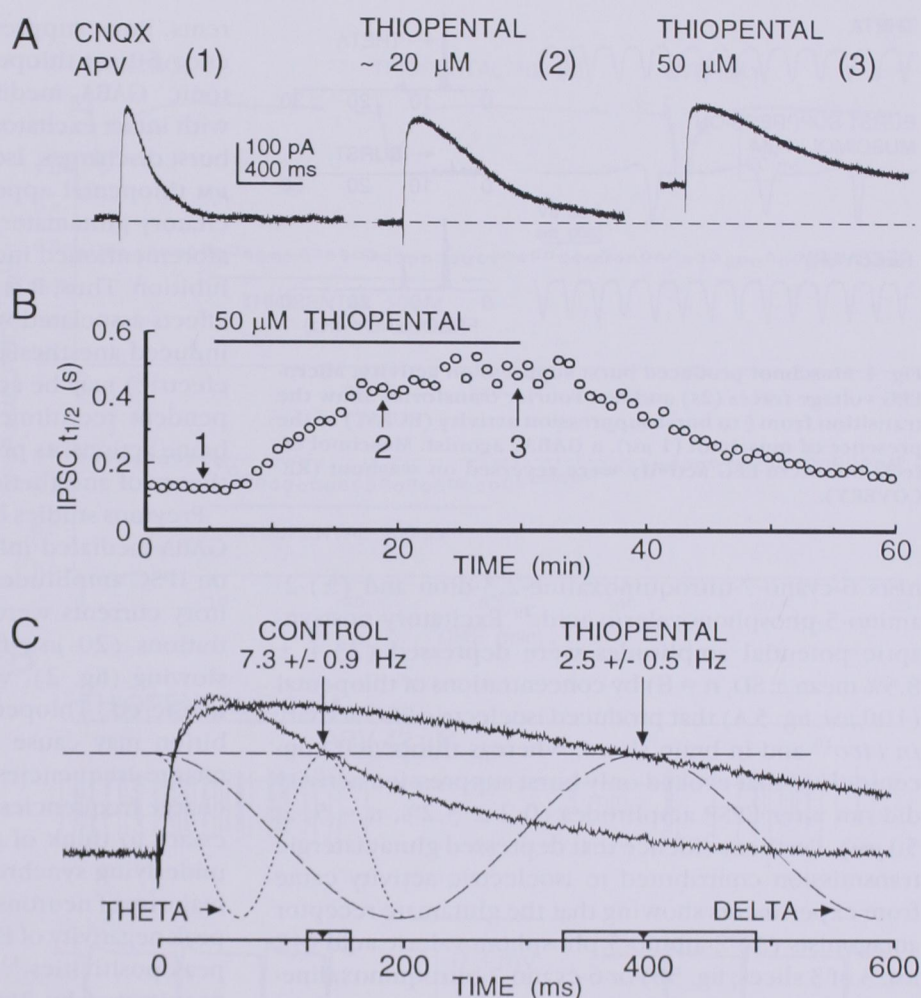

#### Hyperpolarization Underlies Thiopental-induced Burst Suppression Activity

Whole cell voltage clamp recordings revealed a tonic activation of inhibitory currents ( $\sim 100 \text{ pA}$ ; fig. 3A) at thiopental concentrations ( $50 \mu\text{M}$ ) that elicited sustained burst suppression micro-EEG activity. To test whether tonic GABA<sub>A</sub>-mediated hyperpolarization contributed to burst suppression activity, micro-EEG effects of the GABA<sub>A</sub> agonist muscimol were studied. Muscimol ( $1 \mu\text{M}$ ) produced a direct transition from  $\theta$  to burst suppression activity without a slowing to  $\delta$  frequencies (5 of 5 slices; fig. 4). The time course of this effect was rapid with bursts typically occurring 3–5 min after muscimol application, and recovery to  $\theta$ -like activity

occurring 2–4 min after drug removal. Muscimol-induced burst suppression activity was similar to burst suppression activity produced by  $50 \mu\text{M}$  thiopental in that high amplitude ( $\geq 200 \mu\text{V}$ ) monophasic or biphasic bursts occurred with an interburst interval of 0.5–3.0 s.

#### Depression of Excitatory Transmission Resulted in Isoelectric Activity

Thiopental effects on glutamate-mediated transmission were investigated using evoked field EPSPs in area CA1 of the rat hippocampus. These EPSPs are glutamate mediated,<sup>28</sup> and can be completely blocked by concurrent application of the glutamate receptor antago-



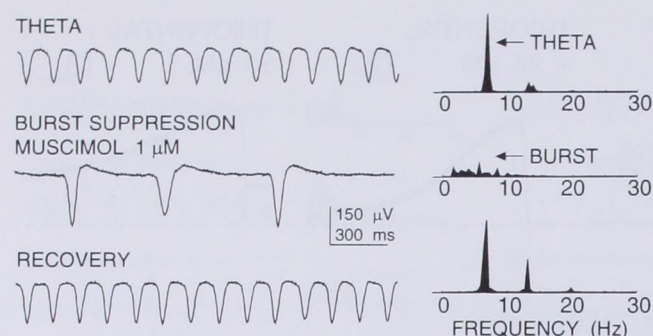

**Fig. 4.** Muscimol produced burst suppression activity. Micro-EEG voltage traces (2s) and fast Fourier transforms show the transition from  $\theta$  to burst suppression activity (BURST) in the presence of muscimol ( $1 \mu\text{M}$ ), a GABA<sub>A</sub> agonist. Muscimol effects on micro-EEG activity were reversed on washout (RECOVERY).

nists 6-cyano-7-nitroquinoxaline-2,3-dione and ( $\pm$ )-2-amino-5-phosphonovaleric acid.<sup>29</sup> Excitatory postsynaptic potential amplitudes were depressed ( $23.4 \pm 8.5\%$  mean  $\pm$  SD,  $n = 8$ ) by concentrations of thiopental ( $100 \mu\text{M}$ ; fig. 5A) that produced isoelectric EEG activity *in vivo*<sup>10</sup> and in brain slices, whereas thiopental concentrations that evoked only burst suppression activity did not alter EPSP amplitudes ( $0.2 \pm 3.2\%$ ;  $n = 5$ ; at  $50 \mu\text{M}$ ). Further evidence that depressed glutamatergic transmission contributed to isoelectric activity came from experiments showing that the glutamate receptor antagonists ( $\pm$ )-2-amino-5-phosphonovaleric acid ( $42 \mu\text{M}$ , 3 of 3 slices; fig. 5B) or 6-cyano-7-nitroquinoxaline-2,3-dione ( $8 \mu\text{M}$ , 5 of 5 slices) could force transitions from burst suppression to isoelectric activity in the presence of  $50 \mu\text{M}$  thiopental. This concentration of thiopental ( $50 \mu\text{M}$ ) by itself did not produce isoelectric activity (0 of 10 slices).

## Discussion

Anesthesia has been proposed to result from decreased excitatory transmission,<sup>30–32</sup> increased inhibitory transmission,<sup>1,33–35</sup> and/or inhibition of action potential generation *via* membrane hyperpolarization.<sup>36–38</sup> The current study demonstrated that each of these mechanisms could contribute to thiopental-induced alterations in synchronized neuronal activity. The threefold slowing in neocortical micro-EEG peak frequency from  $\theta$  (7.3 Hz) to  $\delta$  (2.5 Hz) activity, observed in the presence of  $20 \mu\text{M}$  thiopental, was associated with a threefold prolongation of inhibitory cur-

rents. Burst suppression activity occurred in the presence  $50 \mu\text{M}$  thiopental, and appeared to result from tonic GABA<sub>A</sub>-mediated neuronal hyperpolarization, with intact excitatory transmission required to generate burst discharges. Isoelectric activity observed with  $100 \mu\text{M}$  thiopental appeared to result from depressed excitatory glutamatergic transmission, in addition to the aforementioned increases in both phasic and tonic inhibition. Thus, it is possible that the continuum of EEG effects associated with deepening states of thiopental-induced anesthesia ( $\theta > \delta > \text{burst suppression} > \text{isoelectric}$ ) may be accounted for by a concentration-dependent recruitment of separate synaptic and membrane actions, as predicted by a multisite agent-specific theory of anesthetic action.<sup>23,39–41</sup>

Previous studies have shown that anesthetics prolong GABA-mediated inhibition while exerting little effect on IPSC amplitudes.<sup>1,34,42</sup> In the current study, inhibitory currents were prolonged by thiopental concentrations ( $20 \mu\text{M}$ , fig. 3) that produced  $\delta$  frequency slowing (fig. 2), whereas IPSC amplitudes remained unaltered. Thiopental-induced prolongation of inhibition may cause slowing by limiting neuronal discharge frequencies. To understand how limiting discharge frequencies could cause EEG slowing, it is necessary to think of the neuronal population dynamics underlying synchronous oscillatory EEG activity. The majority of neurons discharge preferentially during the peak negativity of EEG oscillations and are silent during peak positivities.<sup>43</sup> Thus, one full EEG oscillation (approximated by  $360^\circ$  of a sine wave, fig. 3C), likely represents the synchronous discharge, quiescence, and secondary discharge of a neuronal population. Stated another way, the length of time between neuronal population discharges determines the periodicity of an EEG oscillation. What then determines neuronal inter-discharge time intervals? One likely candidate is the time course of recurrent GABA-mediated inhibition. In support of this, depression of GABA-mediated inhibition has been shown to elicit high-frequency discharge activity.<sup>44</sup> Conversely, high-frequency discharge activity associated with epilepsy can be suppressed by some barbiturates and other anesthetics<sup>45</sup> known to enhance GABAergic transmission. By prolonging the time course of inhibition,  $20 \mu\text{M}$  thiopental may limit neuronal discharge frequencies, allowing lower frequency  $\delta$  activity while filtering out higher frequency  $\theta$  activity.

Previous studies have shown that burst suppression activity occurs during surgical anesthesia with thiopental.<sup>7,9,11,46–48</sup> In the current study, thiopental-in-



## SYNAPTIC MECHANISMS OF THIOPENTAL

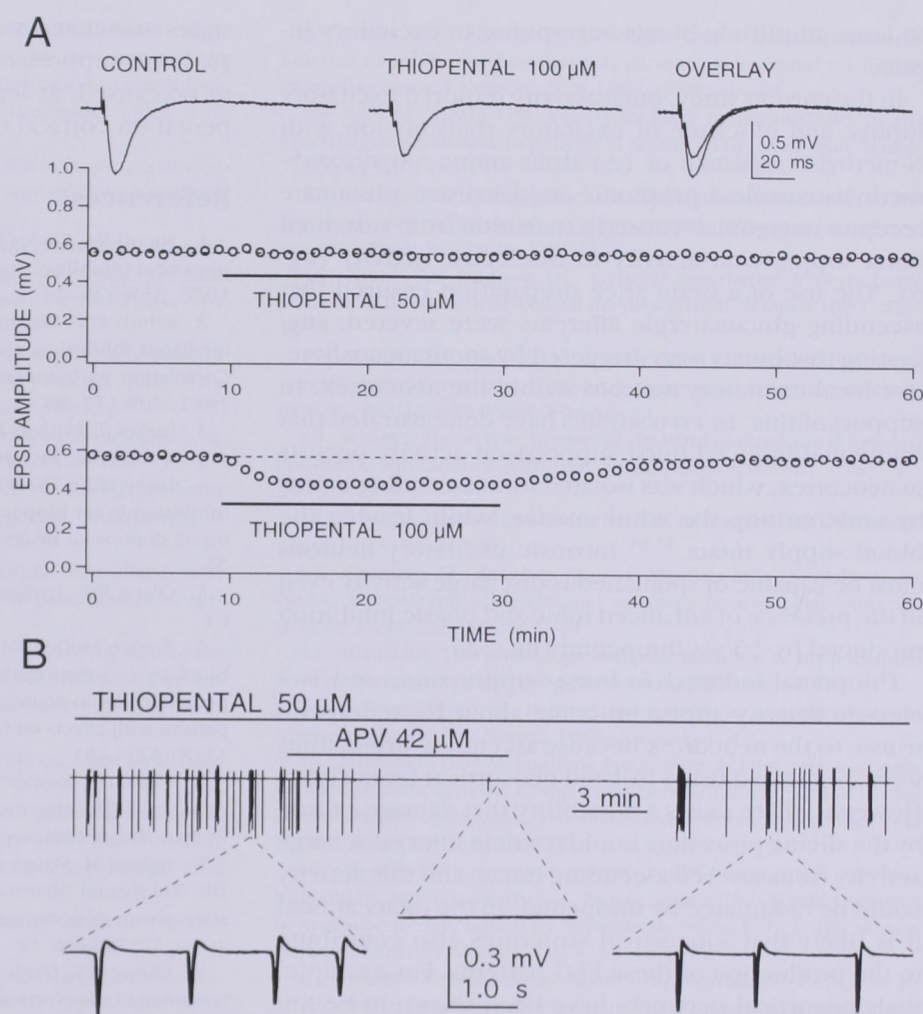

Fig. 5. Depression of glutamate-mediated transmission underlies the transition from burst suppression to isoelectric activity. (A) Data traces (top) show evoked field excitatory postsynaptic potentials (EPSPs) in area CA1 of the hippocampus in control conditions and in the presence of 100  $\mu$ M thiopental. A clear depression in EPSP amplitude was observed when traces were overlaid. Plots display the time course of thiopental (50 and 100  $\mu$ M) effects on EPSP amplitudes (bottom). Thiopental (50  $\mu$ M) had no effect on EPSP amplitude, whereas 100  $\mu$ M thiopental depressed EPSP amplitude by 23%. (B) Steady-state burst suppression activity was evoked and maintained in the presence of 50  $\mu$ M thiopental. The NMDA receptor antagonist, D-( $\pm$ )-2-amino-5-phosphonovaleic acid (42  $\mu$ M), produced a transition to isoelectric activity which recovered to burst suppression on washout. Expanded time scale (bottom) shows individual burst events.

duced burst suppression-like activity was associated with increased tonic inhibition, evidenced by increased steady-state outward currents observed in the presence of 50  $\mu$ M thiopental (fig. 3A). The ability of muscimol to produce burst suppression activity (fig. 4) demonstrated that enhanced tonic GABAergic hyperpolarization was sufficient to produce this micro-EEG state. In the presence of muscimol,  $\theta$ -like oscillations progressed directly to burst suppression activity without passing through a  $\delta$  state.  $\delta$  activity should not and did not occur under these conditions because muscimol directly opens GABA<sub>A</sub>-gated chloride channels without prolonging IPSC  $t_{1/2}$ <sup>49</sup>; supporting the idea that  $\delta$  slowing resulted from a prolongation of inhibitory currents, whereas burst suppression activity required enhanced tonic inhibition (hyperpolarization).

These results are consistent with previous *in vivo* findings that demonstrated that neocortical neurons hyperpolarize ( $\sim 10$  mV) and increase their resting membrane conductance during anesthetic-induced burst suppression activity.<sup>50</sup> Increased tonic inhibition may contribute to burst suppression activity by hyperpolarizing EEG-generating neurons. Hyperpolarization would have three primary effects: (1) tonic cell discharge frequencies will decrease, reducing excitatory synaptic transmission between cortical neurons; (2) membrane potential-dependent inactivation will be removed from low threshold voltage activated calcium and sodium channels<sup>51</sup>; and (3) reduced cell discharge will leave fewer neurons refractory to firing. These conditions would favor a state in which EEG-generating neurons become both quiescent, leading to periods of suppressed EEG activity, and hyperexcitable, leading



to large amplitude bursts in response to excitatory inputs.

In the current study, burst activity required excitatory inputs, and blockade of excitatory transmission with N-methyl-D-aspartate or ( $\pm$ )-alpha-amino-3-hydroxy-5-methylisoxazole-4-propionic acid/kainate glutamate receptor antagonists caused a transition from sustained burst suppression activity to isoelectric activity (fig. 5). The use of a brain slice preparation ensured that ascending glutamatergic afferents were severed, suggesting that bursts were triggered by spontaneously active local excitatory neurons within the neocortex. In support of this, *in vivo* studies have demonstrated that thiopental-induced burst suppression activity persists in neocortex, which was isolated from ascending inputs by undercutting the white matter, while leaving the blood supply intact.<sup>52,53</sup> Intrinsic excitatory neurons must be capable of spontaneous discharge activity even in the presence of enhanced tonic and phasic inhibition produced by 50  $\mu$ M thiopental (fig. 3A).

Thiopental-induced  $\delta$ , burst suppression, and isoelectric activity appear to come about by actions intrinsic to the neocortex because ascending projections were eliminated using isolated neocortical brain slices. However, there exists a possibility that damage caused by the slicing procedure could result in injury discharge activity from severed ascending tracts, and this activity could be modulated by thiopental. In the intact animal it is likely that subcortical structures also contribute to the production of these EEG patterns. For example, thalamocortical networks have been shown to be important in generating sustained  $\delta$  activity during sleep.<sup>54</sup> One micro-EEG state not observed in neocortical brain slices was an early activation that preceded  $\delta$  activity *in vivo*, and was characterized by increased power in  $\theta$ ,  $\alpha$ , and  $\beta$  frequencies.<sup>10</sup> Consistent with a subcortical loci for EEG activation, previous studies have demonstrated the ability of thalamocortical,<sup>54,55</sup> septocortical, and pontocortical afferents<sup>43,56</sup> to activate cortical EEG signals *in vivo*. In addition, manipulations that disconnect mesencephalic structures from the neocortex also block EEG activation.<sup>57</sup> Thus, subanesthetic concentrations of thiopental may directly excite ascending systems leading to EEG activation. Alternatively, low thiopental concentrations may depress cortical electrical activity resulting in a disinhibition of lower brain stem systems that feedback to excite cortical neurons, resulting in EEG activation. Thus, thiopental-induced EEG activation *in vivo* may reflect indirect effects of thiopental on brainstem activating systems, but EEG

states associated with deepening levels of anesthesia ( $\delta$ , burst suppression, and isoelectric activity) appear to be caused, at least partly, by direct effects of thiopental on cortical neurons.

## References

1. Nicoll RA, Eccles JC, Oshima T, Rubia F: Prolongation of hippocampal inhibitory postsynaptic potentials by barbiturates. *Nature* 1975; 258:625-26
2. Schulz DW, Macdonald RL: Barbiturate enhancement of GABA-mediated inhibition and activation of chloride ion conductance: Correlation with anticonvulsant and anesthetic actions. *Brain Res* 1981; 209:177-88
3. Barker JL, Mathers DA: GABA receptors and the depressant action of pentobarbital. *Trends Neurosci* 1981; 10-13
4. Dunwiddie TV, Worth TS, Olsen RW: Facilitation of recurrent inhibition in rat hippocampus by barbiturate and related nonbarbiturate depressant drugs. *J Pharmacol Exp Ther* 1986; 238(2):564-75
5. Olsen RW: Barbiturates. *Int Anesthesiol Clin* 1988; 26:254-61
6. French-Mullen JM, Barker JL, Rogawski MA: Calcium current block by (-)-pentobarbital, phenobarbital, and CHEB but not (+)-pentobarbital in acutely isolated hippocampal CA1 neurons: Comparison with effects on GABA-activated  $Cl^-$  current. *J Neurosci* 1993; 13(8):3211-21
7. Clark DL, Rosner BS: Neurophysiologic effects of general anesthetics. I. The electroencephalogram and sensory evoked responses in man. *ANESTHESIOLOGY* 1973; 38(6):564-82
8. Buhner M, Maitre PO, Hung OR, Ebling WF, Shafer SL, Stanski DR: Thiopental pharmacodynamics. I. Defining the pseudo-steady-state serum concentration-EEG effect relationship. *ANESTHESIOLOGY* 1992; 77:226-36
9. Ebling WF, Danhof M, Stanski DR: Pharmacodynamic characterization of the electroencephalographic effects of thiopental in rats. *J Pharmacokinetic Biopharm* 1991; 19(2):123-43
10. MacIver MB, Mandema JW, Stanski DR, Bland BH: Thiopental uncouples hippocampal and cortical synchronized EEG activity. *ANESTHESIOLOGY* 1996; 84:1411-24
11. Gustafsson LL, Ebling WF, Osaki E, Stanski DR: Quantitation of thiopental depth of anesthesia in the rat. *ANESTHESIOLOGY* 1996; 84:415-27
12. MacIver MB, Harris DP, Konopacki J, Roth SH, Bland BH: Carbachol induced rhythmical slow wave activity recorded from dentate granule neurons *in vitro*. *Proc West Pharmacol Soc* 1986; 29:159-61
13. MacVicar BA, Tse FwY: Local neuronal circuitry underlying cholinergic rhythmical slow activity in CA3 area of rat hippocampal slices. *J Physiol (Lond)* 1989; 417:197-212
14. Huerta PT, Lisman JE: Heightened synaptic plasticity of hippocampal CA1 neurons during a cholinergically induced rhythmic state. *Nature* 1993; 364:723-5
15. Konopacki J, Golebiewski H, Eckersdorf B: Carbachol-induced theta-like activity in entorhinal cortex slices. *Brain Res* 1992; 572:76-80
16. Konopacki J, Bland BH, MacIver MB, Roth SH: Cholinergic theta rhythm in transected hippocampal slices: independent CA1 and dentate generators. *Brain Res* 1987; 436:217-22



## SYNAPTIC MECHANISMS OF THIOPENTAL

17. Ebling WF, Mills-Williams L, Harapat SR, Stanski DR: High-performance liquid chromatographic method for determining thiopental concentrations in twelve rat tissues: Application to physiologic modeling of disposition of barbiturate. *J Chromatogr* 1989; 490: 339-53
18. Bland BH, Colom LV: Extrinsic and intrinsic properties underlying oscillation and synchrony in limbic cortex. *Prog Neurobiol* 1993; 41:157-208
19. Freund TF, Gulyas AI: GABAergic interneurons containing calbindin D28K or somatostatin are major targets of GABAergic basal forebrain afferents in the rat neocortex. *J Comp Neurol* 1991; 314: 187-99
20. Freund TF, Meskenaite V: gamma-Aminobutyric acid-containing basal forebrain neurons innervate inhibitory interneurons in the neocortex. *Proc Natl Acad Sci U S A* 1992; 89:738-42
21. Pearce RA: Physiological evidence for two distinct GABA<sub>A</sub> responses in rat hippocampus. *Neuron* 1993; 10:189-200
22. MacIver MB, Kendig JJ: Anesthetic effects on resting membrane potential are voltage-dependent and agent specific. *ANESTHESIOLOGY* 1991; 74:83-8
23. MacIver MB, Tauck DL, Kendig JJ: General anaesthetic modification of synaptic facilitation and long-term potentiation in hippocampus. *Br J Anaesth* 1989; 62:301-10
24. Lysakowski A, Wainer BH, Bruce G, Hersh LB: An atlas of the regional and laminar distribution of choline acetyltransferase immunoreactivity in rat cerebral cortex. *Neuroscience* 1989; 28:291-336
25. Zilles KJ: The cortex of the rat, A Stereotaxic Atlas. New York, Springer, 1985
26. Feenstra BW, Holsheimer J: Dipole-like neuronal sources of theta rhythm in dorsal hippocampus, dentate gyrus and cingulate cortex of the urethane-anesthetized rat. *Electroencephalogr. Clin Neurophysiol* 1979; 47:532-8
27. Holsheimer J: Generation of theta activity (RSA) in the cingulate cortex of the rat. *Exp Brain Res* 1982; 47:309-12
28. Collingridge GL, Kehl SJ, McLennan H: Excitatory amino acids in synaptic transmission in the Schaffer collateral-commissural pathway of the rat hippocampus. *J Physiol (Lond)* 1983; 334:33-46
29. Nicoll RA, Malenka RC, Kauer JA: Functional comparison of neurotransmitter receptor subtypes in mammalian central nervous system. *Physiol Rev* 1990; 70:513-65
30. Anis NA, Berry SC, Burton NR, Lodge D: The dissociative anaesthetics, ketamine and phencyclidine, selectively reduce excitation of central mammalian neurones by N-methyl-aspartate. *Br J Pharmacol* 1983; 79:565-75
31. Kullmann DM, Martin RL, Redman SJ: Reduction by general anaesthetics of group Ia excitatory postsynaptic potentials and currents in the cat spinal cord. *J Physiol (Lond)* 1989; 412:277-96
32. Barker JL: Selective depression of postsynaptic excitation by general anaesthetics. *Molecular Mechanisms of Anesthesia, Progress in Anesthesiology*. Edited by Fink BR. New York, Raven, 1975, pp 135-53
33. Gage PW, Robertson B: Prolongation of inhibitory postsynaptic currents by pentobarbitone, halothane and ketamine in CA 1 pyramidal cells in rat hippocampus. *B. J Pharmacol* 1985; 85: 675-81
34. MacIver MB, Tanelian DL, Mody I: Two mechanisms for anesthetic-induced enhancement of GABA<sub>A</sub>-mediated neuronal inhibition. *Ann N Y Acad Sci* 1991; 625:91-6
35. Jones MV, Harrison NL: Effects of volatile anesthetics on the kinetics of inhibitory postsynaptic currents in cultured rat hippocampal neurons. *J Neurophysiol* 1993; 70:1339-49
36. Sato M, Austin GM, Yai H: Increase in permeability of the postsynaptic membrane to potassium produced by 'nembutal.' *Nature* 1967; 215:1506-8
37. Berg-Johnsen J, Langmoen IA: Mechanisms concerned in the direct effect of isoflurane on rat hippocampal and human neocortical neurons. *Brain Res* 1990; 507:28-34
38. Nicoll RA, Madison DV: General anesthetics hyperpolarize neurons in the vertebrate central nervous system. *Science* 1982; 217: 1055-7
39. MacIver MB, Roth SH: Inhalation anaesthetics exhibit pathway-specific and differential actions on hippocampal synaptic responses in vitro. *Br J Anaesth* 1988; 60:680-91
40. Kissin I, Mason JO, Bradley EL, Jr: Pentobarbital and thiopental anesthetic interactions with midazolam. *ANESTHESIOLOGY* 1987; 67: 26-31
41. Kissin I: General anesthetic action: an obsolete notion? *Anesth Analg* 1993; 76:215-8
42. Tanelian DL, Kosick P, Mody I, MacIver MB: The role of the GABA<sub>A</sub> receptor/chloride channel complex in anesthesia. *ANESTHESIOLOGY* 1993; 78:757-76
43. Bland BH: The physiology and pharmacology of hippocampal formation theta rhythms. *Prog Neurobiol* 1986; 26:1-54
44. Schwartzkroin PA: Hippocampal slices in experimental and human epilepsy. *Adv Neurol* 1986; 44:991-1010
45. Jennum P, Dam M, Fuglsang-Frederiksen A: Effect of barbiturate on epileptiform activity: Comparison between intravenous and oral administration. Sphenoidal, zygomatic and temporal recordings. *Acta Neurol Scand* 1993; 88:284-8
46. Mori K: Excitation and depression of CNS electrical activities induced by general anesthetics. *Proceedings of 5th World Congress of Anaesthesiology*. Edited by Miyasaka M, Iwatsuki K, Fujita M. Amsterdam, Excerpta Medica, 1973, pp 40-53
47. Reddy RV, Moorthy SS, Mattice T, Dierdorf SF, Deitch R, Jr: An electroencephalographic comparison of effects of propofol and methohexital. *Electroencephalogr Clin Neurophysiol* 1992; 83:162-8
48. Tomoda K, Shingu K, Osawa M, Murakawa M, Mori K: Comparison of CNS effects of propofol and thiopentone in cats. *Br J Anaesth* 1993; 71:383-7
49. Thompson SM, Gahwiler BH: Activity-dependent disinhibition. III. Desensitization and GABA<sub>A</sub> receptor-mediated presynaptic inhibition in the hippocampus in vitro. *J Neurophysiol* 1989; 61:524-33
50. Steriade M, Amzica F, Contreras D: Cortical and thalamic cellular correlates of electroencephalographic burst-suppression. *Electroencephalogr Clin Neurophysiol* 1994; 90:1-16
51. Hille B: Classical Biophysics of the squid giant axon, Na and K channels of axons, calcium channels, Ionic Channels of Excitable Membranes. Sunderland, Sinauer Associates, 1992, pp 43, 59-81, 101-4
52. Swank RL: Synchronization of spontaneous electrical activity of cerebrum by barbiturate narcosis. *J Neurophysiol* 1949; 12:161-72
53. Henry CE, Scoville WB: Suppression-burst activity from isolated cerebral cortex in man. *Electroencephalogr Clin Neurophysiol* 1952; 4:1-22
54. Steriade M, McCormick DA, Sejnowski TJ: Thalamocortical os-



cillations in the sleeping and aroused brain. *Science* 1993b; 262: 679-85

55. Steriade M, Contreras D, Curro Dossi R, Nunez A: The slow (<1 Hz) oscillation in reticular thalamic and thalamocortical neurons: scenario of sleep rhythm generation in interacting thalamic and neocortical networks. *J Neurosci* 1993a; 13:3284-99

56. Rainnie DG, Grunze HC, McCarley RW, Greene RW: Adenosine

inhibition of mesopontine cholinergic neurons: implications for EEG arousal. *Science* 1994; 263:689-92

57. Schneider J, Thomalske G: Exploration pharmacodynamique cortico-sous-corticale et ses criteres electrographiques. La determination d'un foyer lesionnel chez l'homme par la technique pentatholique. *Electroencephalogr Clin Neurophysiol* 1956; 8: 353-69
